# Supplementary material
Source: Springer Nature journal article supplement (https://www.springermedizin.de/resource/supplementary/12935_2010_257_MOESM17_ESM.pdf/9540160)

**A**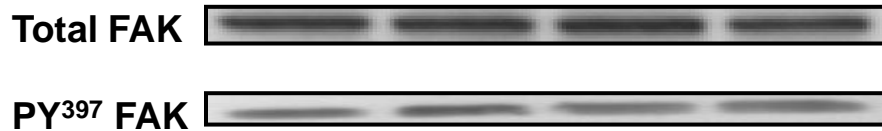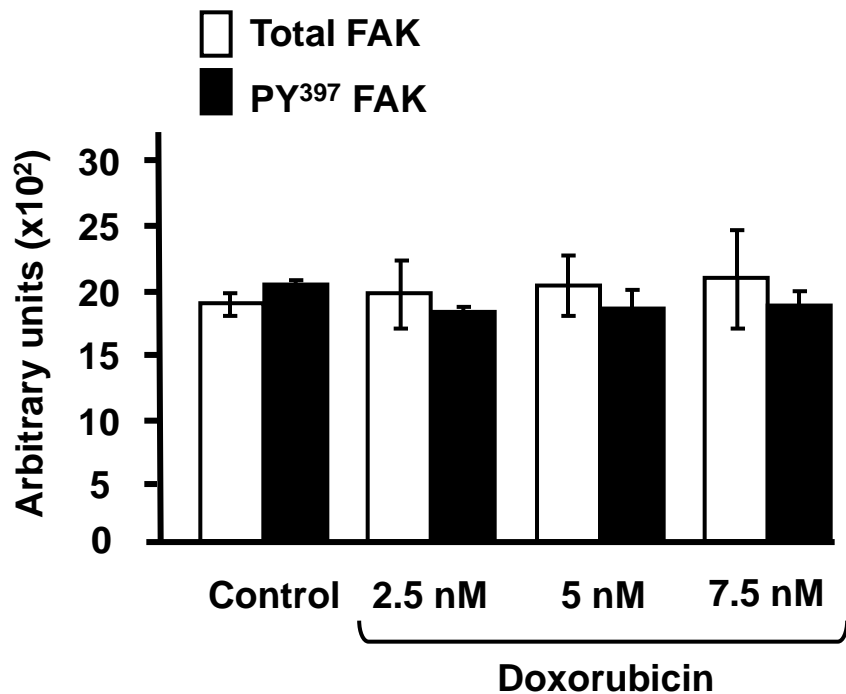**B**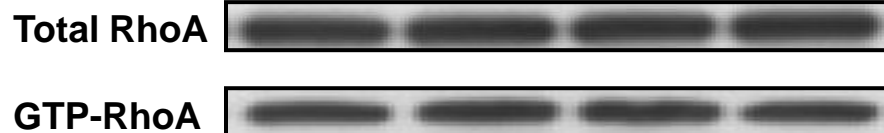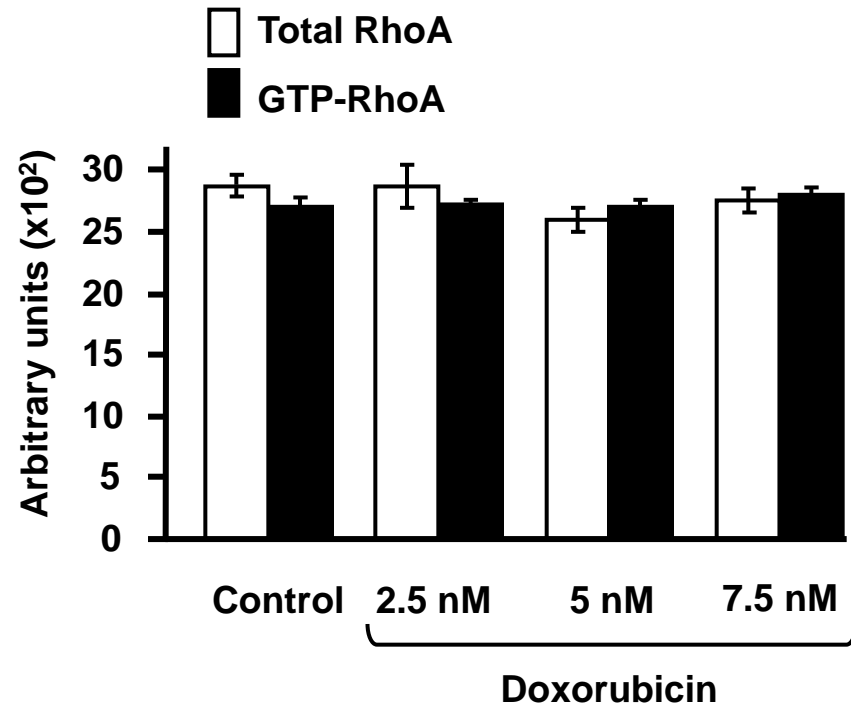

Supplement: MOESM17 [file 9540160]
